# Comparison of the Effects of Racemic Bupivacaine, Levobupivacaine, and Ropivacaine on Ventricular Conduction, Refractoriness, and Wavelength

## An Epicardial Mapping Study

Antoine G. M. Aya, M.D., M.Sc.,\* Jean E. de La Coussaye, M.D., Ph.D.,† Emmanuelle Robert, Ph.D.,‡ Jacques Ripart, M.D., Ph.D.,\* Philippe Cuvillon, M.D.,\* Jean Xavier Mazoit, M.D., Ph.D.,§ Pascal Jeannes, M.D.,\* Pascale Fabbro-Péray, M.D., Ph.D.,|| Jean-Jacques Eledjam, M.D.#

**Background:** The study was designed to compare the effects of equimolar concentrations of racemic bupivacaine, levobupivacaine, and ropivacaine on ventricular conduction, anisotropy, duration and homogeneity of refractoriness, and wavelengths, and to provide a potency ratio for effects on conduction velocity.

**Methods:** Isolated frozen rabbit hearts (which leave a thin layer of surviving epicardial muscle) were treated with 0.1, 1, and 10  $\mu$ M racemic bupivacaine, levobupivacaine, or ropivacaine. Left ventricular longitudinal and transverse conduction velocities, anisotropic ratio, minimum pacing cycle length, use dependency, duration and dispersion of ventricular effective refractory period, and wavelengths were studied. A high-resolution mapping system was used for data acquisition. In addition to two-way analysis of variance for repeated measures, data for conduction velocities were fitted simultaneously using a nonlinear mixed-effect modeling program to allow intergroup comparison.

**Results:** Each agent induced a concentration- and use-dependent slowing of conduction velocities, with no change of the anisotropic ratio. The use-dependent effect of levobupivacaine is similar to that of racemic bupivacaine concerning longitudinal conduction velocity. Fitting of conduction velocities provided a racemic bupivacaine to levobupivacaine and to ropivacaine ratio of 1:1.38 for concentration effect at 1,000-ms pacing cycle length, and 1:0.74 for use-dependent effect at 600-ms pacing cycle length. Racemic bupivacaine and levobupivacaine prolonged the ventricular effective refractory period, whereas ropivacaine did not. No dispersion in ventricular effective refractory period values occurred. All three agents induced significant decreases in wavelengths. This effect was not different among groups.

**Conclusions:** Differences among racemic bupivacaine, levobupivacaine, and ropivacaine at equimolar concentrations are mainly caused by the use-dependent effects on conduction velocities and the concentration-dependent effects on ventricular effective refractory period. Therefore, one must take into ac-

count the corresponding pacing rates when comparing the potency ratios of local anesthetics.

LIFE-THREATENING ventricular tachycardia or fibrillation and cardiac arrest were reported in patients accidentally given a large intravascular dose of racemic bupivacaine.<sup>1</sup> Because of the potential cardiotoxicity of racemic bupivacaine, ropivacaine and levobupivacaine have been developed as safer alternatives.<sup>2-4</sup> Experimental and clinical data showed that these two agents are as potent or less potent but less toxic than racemic bupivacaine. Although clinical data provided ropivacaine and levobupivacaine to racemic bupivacaine equipotency ratios of approximately 0.6 and 0.98, respectively,<sup>5,6</sup> data from animals and isolated heart studies suggested that this ratio may be different in cardiac tissue. Using the prolongation of the QRS interval in spontaneous rhythm as a parameter of electrophysiologic toxicity, a toxicity ratio of 15:6.7:1 was reported for racemic bupivacaine, racemic ropivacaine, and lidocaine,<sup>2</sup> and a toxicity ratio of 2.1:1.2:1 was reported for racemic bupivacaine, levobupivacaine, and ropivacaine, respectively.<sup>7</sup> Using the calculated maximal QRS widening in isolated buffer-perfused and paced rabbit hearts, Mazoit *et al.*<sup>8</sup> showed that the three agents induce a QRS widening in the ratio 1:0.4:0.3.

Cardiac arrhythmias mainly account for the fatal outcome of animals given large intravenous doses of racemic bupivacaine. One mechanism of these cardiac arrhythmias is that racemic bupivacaine induces a concentration- and use-dependent slowing of ventricular conduction, facilitating the occurrence of ventricular conduction blocks and therefore of arrhythmias by reentry.<sup>9</sup> The current study was designed to compare the effects of equimolar concentrations of racemic bupivacaine, levobupivacaine, and ropivacaine on parameters critical for the occurrence of reentrant circuits on ventricles: conduction velocity, anisotropy, use dependency, duration and spatial dispersion of refractory periods, and ventricular wavelengths. We also attempted to provide a potency ratio for the effects on conduction velocity.

## Methods

### Heart Preparation

The principles for the care and treatment of experimental animals complied with the national guidelines of

\* Staff Anesthesiologist, ‡ Scientist, Laboratory of Anesthesiology and Cardiovascular Physiology, Medical School of Montpellier-Nîmes. † Professor and Chair, Department of Emergency and Critical Care, || Biostatistician, Department of Epidemiology and Biostatistics, # Professor and Chair, Department of Anesthesiology, University Hospital of Nîmes, Nîmes, France. § Staff Anesthesiologist, Anesthesia Laboratory, Unité propre de Recherche de l'Enseignement Supérieur-Equipe d'Accueil 392 Kremlin-Bicêtre College of Medicine, Paris-Sud, France.

Received from the Laboratory of Anesthesiology and Cardiovascular Physiology, Unité propre de Recherche de l'Enseignement Supérieur-Equipe d'Accueil 2992, Medical School of Montpellier-Nîmes, Nîmes, France. Submitted for publication September 1, 2000. Accepted for publication September 18, 2001. Supported by the Conseil Régional du Languedoc-Roussillon, the Conseil Général du Département du Gard, Nîmes, France, and the Fondation pour la Recherche Médicale Française, Paris, France. Presented in part at the 38th National Congress of the Société Française d'Anesthésie et de Réanimation, Paris, France, September 24-27, 1998, and at the 24th Annual Meeting of the American Society of Regional Anesthesia, Philadelphia, Pennsylvania, May 6-9, 1999.

Address reprint requests to Dr. de La Coussaye: Départements d'Anesthésie-Réanimation et de l'Urgence, CHU Gaston Doumergue, 5 rue Hoche, 30029 Nîmes cedex 04, France. Address electronic mail to: jean.emmanuel.delacoussaye@chu-nîmes.fr. Individual article reprints may be purchased through the Journal Web site, www.anesthesiology.org.

the French Ministry of Agriculture. The procedure for heart preparation was described in detail in previous studies from our laboratory.<sup>10,11</sup> Briefly, hearts were rapidly removed from New Zealand rabbits (weight,  $3.4 \pm 0.7$  kg) during etomidate anesthesia (1 mg/kg administered intravenously followed by an infusion of  $0.1 \text{ mg} \cdot \text{kg}^{-1} \cdot \text{min}^{-1}$ ) and were connected to a Langendorff perfusion system using Tyrode solution. The heart was perfused with a constant flow of 40–50 ml/min, resulting in a pressure of  $70 \pm 10$  mmHg. The composition of the Tyrode solution was as follows: 130 mM NaCl, 20.1 mM  $\text{NaHCO}_3$ , 4.0 mM KCl, 2.2 mM  $\text{CaCl}_2$ , 0.6 mM  $\text{MgCl}_2$ , 1.2 mM  $\text{NaH}_2\text{PO}_4$ , and 12 mM glucose. The solution was saturated with a mixture of 95%  $\text{O}_2$  and 5%  $\text{CO}_2$ , pH was adjusted at  $7.40 \pm 0.02$ , and the temperature of the heart was maintained at  $37^\circ\text{C}$  throughout the experiment.

In all hearts, an endocardial cryotechnique was used to freeze the complete right ventricle, the interventricular septum, and the endocardial and intramural layers of the free wall of the left ventricle (frozen heart). The cryotechnique was also previously described<sup>10,11</sup> and allowed us to obtain a thin surviving epicardial layer of the free wall of the left ventricle, approximately 1 mm thick. It was previously demonstrated that in this thin surviving layer, refractoriness and conduction velocity are not affected by the procedure and remain stable for hours.<sup>12</sup> The cryoprotocol was used to allow complete and bidimensional mapping of electrical activation. At the end of the experiments, the hearts were dissected to verify the efficacy of the cryoprotocol, and their results were excluded from the study if the freezing was inadequate.

### Protocol

After a 60-min stabilization period, hearts were given 0.1, 1.0, and 10  $\mu\text{M}$  racemic bupivacaine, levobupivacaine, or ropivacaine at increasing concentrations, each concentration being infused for 20 min. Bupivacaine-HCl (Qualimed, Lyon, France), levobupivacaine-HCl (Abbott, Rungis, France), and ropivacaine-HCl (Astra, Rueil Malmaison, France) were obtained commercially as 5-, 2.5-, and 10-mg/ml solutions, respectively.

**Data Acquisition System and Pacing Protocol.** High-resolution mapping of epicardial excitation was performed using a programmable constant current stimulator and a spoon-shaped electrode containing 256 unipolar electrodes coupled with a computerized mapping system, allowing simultaneous recording, storage, and automatic analysis of all electrograms and online presentation of color-coded activation maps (Maptech system, Maastricht, The Netherlands).<sup>13</sup> Throughout the study, bipolar stimulation was applied by trains of 10 stimuli (S1–S1), with a pause of 2,000 ms introduced between successive trains. Although the basic pacing cycle length (PCL) was 300 ms, values ranged from 1,000

to 200 ms to test the use dependency. The pacing protocol used for the induction of arrhythmias consisted on application of trains of 10 stimuli at a regular cycle length, which was progressively decreased at 10-ms steps until 1-to-1 capture of the ventricle failed. The shortest PCL reached ( $\text{PCL}_{\min}$ , in milliseconds) was used as an index of use dependency as it reflects the beat-to-beat recovery of excitability. This pacing protocol was applied during baseline conditions, after each dose of racemic bupivacaine, levobupivacaine, or ropivacaine, and after washout. Inducible ventricular dysrhythmias were recorded and analyzed.

**Electrophysiologic Measurements.** The following parameters were measured: ventricular effective refractory period (VERP, milliseconds), longitudinal ventricular conduction velocity ( $\theta_L$ , centimeters per second), transverse ventricular conduction velocity ( $\theta_T$ , centimeters per second), the anisotropic ratio ( $\theta_L/\theta_T$ ), and  $\text{PCL}_{\min}$ . During the experiment, all of these parameters were recorded using the same pacing site, which was located at the center of the thin surviving layer of the left ventricle. The procedure for the determination and the definition of each parameter was previously described.<sup>11</sup> Briefly, VERP was determined using the premature impulse technique during pacing at a 300-ms PCL. To test the dispersion of repolarization over the left epicardium, VERP was measured on a total of six sites on each heart. To increase the resolution of the spatial dispersion of VERP, the six measures were performed in the lower left quadrant of the epicardial area.<sup>10</sup> The dispersion of refractoriness was quantified by the index of dispersion, defined as the quotient of the SD and the mean of VERP, and by the maximal dispersion, defined as the difference between the maximum and the minimum values of VERP.<sup>11</sup> Concerning conduction, it is established that the direction-dependent differences in axial resistance result in anisotropic conduction,<sup>14,15</sup> which can contribute to reentrant arrhythmias. Therefore, pacing at the center of the thin surviving layer of the left ventricle produced an ellipsoidal spread of propagation, allowing the identification of the myocardial fiber orientation, with fast conduction parallel to the fiber axis ( $\theta_L$ ) and slow conduction perpendicular to the fiber axis ( $\theta_T$ ). In each experiment,  $\theta_L$ ,  $\theta_T$ , and  $\theta_L/\theta_T$  were measured after 10 basic stimuli (S1–S1) at 1,000-ms interval. The absolute decrease in  $\theta_L$  and  $\theta_T$  at 10  $\mu\text{M}$  ( $\Delta\theta_L$  and  $\Delta\theta_T$ , in milliseconds) was calculated for each agent and was used to compare the concentration effect among agents. To test the use dependency of the drugs,  $\theta_L$  and  $\theta_T$  were also measured after 10 basic stimuli at 900-, 800-, 700-, 600-, 500-, 400-, 300-, 250-, and 200-ms intervals. An attempt was made to calculate the dosing of local anesthetics that induces a 50% decrease in longitudinal and transverse conduction velocities ( $\text{ED}_{50}$ ) at 1,000- and 600-ms PCL using the program NONMEM (see Statistical

Analysis), to provide a potency ratio of racemic bupivacaine, levobupivacaine, and ropivacaine. PCL at 600 ms was chosen because it was the shortest PCL for which a sufficient number of hearts could be effectively paced at 10  $\mu\text{M}$  local anesthetics. Finally, the wavelength (in millimeters), defined as the product of conduction velocity and VERP, was calculated for the longitudinal and transverse directions, using respective conduction velocities measured at 300-ms PCL.

**Definition of Ventricular Dysrhythmias.** Induced dysrhythmias were noted and analyzed to determine the reentrant nature. We defined ventricular dysrhythmias as ventricular fibrillation and sustained and nonsustained ventricular tachycardia. Sustained ventricular tachycardia was defined as a ventricular tachycardia lasting longer than 30 s, and nonsustained ventricular tachycardia was defined as a ventricular tachycardia lasting more than 3 successive beats but less than 30 s. A separation into monomorphic and polymorphic ventricular tachycardia was made. Monomorphic ventricular tachycardia and ventricular fibrillation were expected to be terminated by overdrive pacing and administration of potassium chloride, respectively.

#### Statistical Analysis

All variables were expressed as mean  $\pm$  SD. Two-way analysis of variance for repeated measures followed by contrast analysis and Bonferroni correction was used for comparisons within and among groups. In addition, a curve of conduction velocity *versus* PCL was plotted for each heart at baseline and for each local anesthetic concentration. Areas under the curves of conduction velocity were calculated and used for the overall comparison of the use-dependent effect of local anesthetics. Parameters taken into account for analysis of conduction velocities were the treatment group and the PCL. Parameters taken into account for analysis of PCL<sub>min</sub>, VERP, wavelengths, index of dispersion, and maximal dispersion were the treatment group and the dose.  $P < 0.05$  was considered to be statistically significant.

In addition to analysis of variance, the decrease in conduction velocity (E) was fitted to the following  $E_{\text{max}}$  model:

$$E = E_0 \left( 1 - \frac{E_{\text{max}_i} D}{D_{i50} + D} \right) \quad (1)$$

where  $E_0$  is the individual measured basal conduction velocity, D is dosing of drug i (bupivacaine, levobupivacaine, or ropivacaine),  $E_{\text{max}_i}$  is the maximum decrease in conduction velocity, and  $D_{i50}$  is the drug amount producing half the maximum decrease in conduction velocity. Longitudinal and transverse velocities were considered as bivariate observations and were simultaneously fitted. Two sets of data (1,000- and 600-ms PCL) were separately fitted using nonlinear mixed-effect modeling with the program NONMEM (version V level 1.1).<sup>16</sup>

Intraindividual and interindividual variability were modeled as  $\text{fexp}(\varepsilon)$  or as  $\theta \exp(\eta)$ , respectively (assuming a log-normal distribution), where f and  $\theta$  are the vectors of observations and of fixed-effect parameters, respectively, and  $\varepsilon$  and  $\eta$  are the vectors of intraindividual and of interindividual variability, respectively. We used the first-order conditional estimation method with interaction. We used a covariance term between the elements of  $\varepsilon$ , the vector of residual error caused by intraindividual and measurement variability. At each PCL, a full model with  $E_{\text{max}}$  and  $ED_{50}$  considered relevant for each of the three drugs was compared with successive reduced models with these parameters considered common among drugs. The choice between models was made using the log-likelihood ratio test.<sup>17</sup>

## Results

Six hearts were excluded from the study because of inadequate freezing (ineffective pacing or blocks of conduction). Thus, 26 hearts were included in the study, nine in the racemic bupivacaine and levobupivacaine groups, and eight in the ropivacaine group. All hearts could be paced until a PCL of 200 ms at baseline and at 0.1  $\mu\text{M}$  in each treatment group. At 1  $\mu\text{M}$  racemic bupivacaine, levobupivacaine, and ropivacaine, four, five, and three hearts could not be regularly paced at a PCL of 200 ms, respectively. At 10  $\mu\text{M}$  local anesthetics, all hearts could be paced at 1,000 ms, except one heart in the racemic bupivacaine group. Furthermore, at 10  $\mu\text{M}$  racemic bupivacaine, eight hearts could be paced effectively until 700 ms, seven until 600 ms, one until 500 ms, and none at a shorter PCL. At 10  $\mu\text{M}$  levobupivacaine, eight hearts could be paced until 500 ms, and none at a shorter PCL. At 10  $\mu\text{M}$  ropivacaine, seven hearts could be paced until 600 ms, six until 500 ms, two until 400 ms, and none at a shorter PCL. After washout, all hearts recovered their ability to be paced until 200 ms. One sustained monomorphic ventricular tachycardia was observed during pacing at 250 ms after 1  $\mu\text{M}$  racemic bupivacaine. Analysis of the maps showed that the ventricular tachycardia was reentrant.

#### Effects on Conduction Velocity and Anisotropy

Baseline values of conduction velocities were not different among treatment groups. All three agents induced a concentration-dependent slowing of  $\theta_L$  and  $\theta_T$ , with no change in anisotropic ratio. Effects of increasing concentrations of racemic bupivacaine, levobupivacaine, and ropivacaine on conduction velocities and anisotropic ratio at a PCL of 1,000 ms are reported in table 1. The comparison between the three groups showed that the decrease in  $\theta_L$  was not statistically different, but ropivacaine decreased  $\theta_T$  less than bupivacaine ( $P < 0.01$ ; table 2).



**Table 1. Concentration-dependent Effect of Racemic (Rac) Bupivacaine, Levobupivacaine, and Ropivacaine on Longitudinal ( $\theta$ L) and Transverse ( $\theta$ T) Conduction Velocity at PCL 1,000 ms, on Anisotropic Ratio ( $\theta$ L/ $\theta$ T), and on the Shortest Pacing Cycle Length (PCL<sub>min</sub>)**

|                         | $\theta$ L<br>(cm/s) | $\theta$ T<br>(cm/s) | $\theta$ L/ $\theta$ T | PCL <sub>min</sub><br>(ms) |
|-------------------------|----------------------|----------------------|------------------------|----------------------------|
| Rac bupivacaine (n = 9) |                      |                      |                        |                            |
| Baseline                | 79.5 ± 11.6          | 39.3 ± 6.5           | 2.00 ± 0.29            | 167.5 ± 19.9               |
| 0.1 $\mu$ M             | 75.7 ± 8.1           | 37.1 ± 5.9           | 2.02 ± 0.32            | 176.5 ± 25.2               |
| 1 $\mu$ M               | 72.9 ± 7.5*          | 34.5 ± 6.8*          | 2.11 ± 0.36            | 179.0 ± 20.8               |
| 10 $\mu$ M              | 59.5 ± 8.1*†‡        | 26.0 ± 5.6*†‡        | 2.03 ± 0.76            | 543.8 ± 82.1*              |
| Washout                 | 77.8 ± 9.3           | 36.9 ± 7.5           | 2.12 ± 0.39            | 181.1 ± 27.1               |
| Levobupivacaine (n = 9) |                      |                      |                        |                            |
| Baseline                | 75.9 ± 10.6          | 37.1 ± 5.2           | 2.05 ± 0.14            | 169.3 ± 21.7               |
| 0.1 $\mu$ M             | 70.5 ± 11.1          | 35.0 ± 4.4           | 2.01 ± 0.22            | 176.1 ± 21.5               |
| 1 $\mu$ M               | 66.3 ± 12.7*         | 32.8 ± 4.8*          | 2.02 ± 0.28            | 194.4 ± 25.5               |
| 10 $\mu$ M              | 57.5 ± 9.0*†‡        | 28.3 ± 5.0*†‡        | 2.07 ± 0.40            | 420.0 ± 42.2*              |
| Washout                 | 69.5 ± 11.8          | 33.9 ± 4.2           | 2.05 ± 0.25            | 184.4 ± 18.8               |
| Ropivacaine (n = 8)     |                      |                      |                        |                            |
| Baseline                | 79.4 ± 14.6          | 36.2 ± 4.9           | 2.29 ± 0.21            | 173.3 ± 15.0               |
| 0.1 $\mu$ M             | 76.6 ± 13.7          | 34.3 ± 4.9           | 2.25 ± 0.25            | 181.1 ± 16.2               |
| 1 $\mu$ M               | 73.8 ± 13.7          | 33.1 ± 4.2           | 2.24 ± 0.35            | 187.8 ± 12.0               |
| 10 $\mu$ M              | 66.1 ± 9.8*†         | 28.7 ± 3.1*†‡        | 2.33 ± 0.35            | 411.1 ± 65.1*              |
| Washout                 | 73.9 ± 9.5           | 34.8 ± 3.9           | 2.12 ± 0.21            | 190.0 ± 22.9               |

Pacing site was located at the center of the left ventricular epicardium. Data are mean ± SD.

\*  $P < 0.05$  versus baseline. †  $P < 0.05$  versus 0.1  $\mu$ M. ‡  $P < 0.05$  versus 1  $\mu$ M.

A use-dependent effect was observed with each agent. A significant increase in PCL<sub>min</sub> was observed at 10  $\mu$ M of each agent (table 1). The comparison between the three groups showed that racemic bupivacaine increased PCL<sub>min</sub> significantly more than levobupivacaine ( $P < 0.01$ ) and ropivacaine ( $P < 0.001$ ), with no difference between levobupivacaine and ropivacaine. Moreover, figures 1 and 2 show that racemic bupivacaine and levobupivacaine decreased  $\theta$ L more than ropivacaine in a use-dependent manner ( $P < 0.05$ ), but no difference occurred for  $\theta$ T. Finally, the simultaneous fitting of  $\theta$ L and  $\theta$ T allowed the analysis of these parameters at once. At 1,000-ms PCL (*i.e.*, concentration effect) and at 600-ms PCL (*i.e.*, use-dependent effect), a first reduced model considered a common ED<sub>50</sub> for all three drugs ( $P > 0.2$ , chi-square, 2 *df* reduced model 1 *vs.* full model). The best model was a further reduced model with E<sub>max</sub> common to levobupivacaine and to ropiva-

caine ( $P > 0.15$  and 0.20 for 1,000 and 600 ms, respectively, chi-square, 1 *df* reduced model 2 *vs.* reduced model 1). All other models were significantly different at  $P < 0.01$ . E<sub>max</sub> and ED<sub>50</sub> values are shown in table 3. In summary, racemic bupivacaine and levobupivacaine-ropivacaine slowed conduction velocities in the ratio 1:1.38 at 1,000-ms PCL and induced a use-dependent slowing of conduction in the ratio 1:0.74 at 600-ms PCL. The maps in figure 3 show the PCL effect (1,000 *vs.* 300 ms) on conduction velocities in hearts given 1  $\mu$ M racemic bupivacaine (figs. 3A and B), levobupivacaine (figs. 3C and D), or ropivacaine (figs. 3E and F).

#### Effects on Ventricular Effective Refractory Period and Wavelength

The effects of racemic bupivacaine, levobupivacaine, and ropivacaine on conduction velocities measured at 300-ms PCL, VERP, and wavelengths are shown in table 4. Racemic bupivacaine and levobupivacaine prolonged the VERP, whereas ropivacaine did not. However, no inter-group statistical difference was observed among treatment groups. In all three groups, there was no intersite variation of VERP values, as shown by the lack of increase in index of dispersion and maximal dispersion (table 5), although the baseline values of the levobupivacaine group tend to be different from those of the other groups ( $P = 0.05$ ). Changes in conduction velocities and VERP resulted in a significant shortening in longitudinal and transverse wavelengths (table 4). Racemic bupivacaine, levobupivacaine, and ropivacaine shortened  $\lambda$ L by 13.8, 16.5, and 9.9%, and  $\lambda$ T by 23.0, 14.7, and 12.6%, respectively. However,

**Table 2. Comparison of Absolute Decrease in Conduction Velocities by 10  $\mu$ M Local Anesthetics at PCL 1,000 and 600 ms**

|                         | Rac Bupivacaine | Levobupivacaine | Ropivacaine |
|-------------------------|-----------------|-----------------|-------------|
| PCL 1,000 ms            |                 |                 |             |
| $\Delta\theta$ L (cm/s) | 20.5 ± 8.5      | 18.4 ± 8.6      | 13.2 ± 10.9 |
| $\Delta\theta$ T (cm/s) | 11.9 ± 6.0      | 8.7 ± 3.8       | 7.0 ± 4.5*  |
| PCL 600 ms              |                 |                 |             |
| $\Delta\theta$ L (cm/s) | 35.3 ± 10.7     | 28.4 ± 11.9     | 29.3 ± 16.6 |
| $\Delta\theta$ T (cm/s) | 20.5 ± 4.5      | 13.2 ± 4.8      | 15.1 ± 7.5  |

\*  $P < 0.01$  versus the corresponding variable in the racemic (Rac) bupivacaine group. Racemic bupivacaine tended to decrease  $\theta$ T more than the other agents at pacing cycle length (PCL) 600 ms ( $P = 0.06$ ).

$\Delta\theta$ L and  $\Delta\theta$ T = absolute decreases in longitudinal and transverse conduction velocities, respectively.

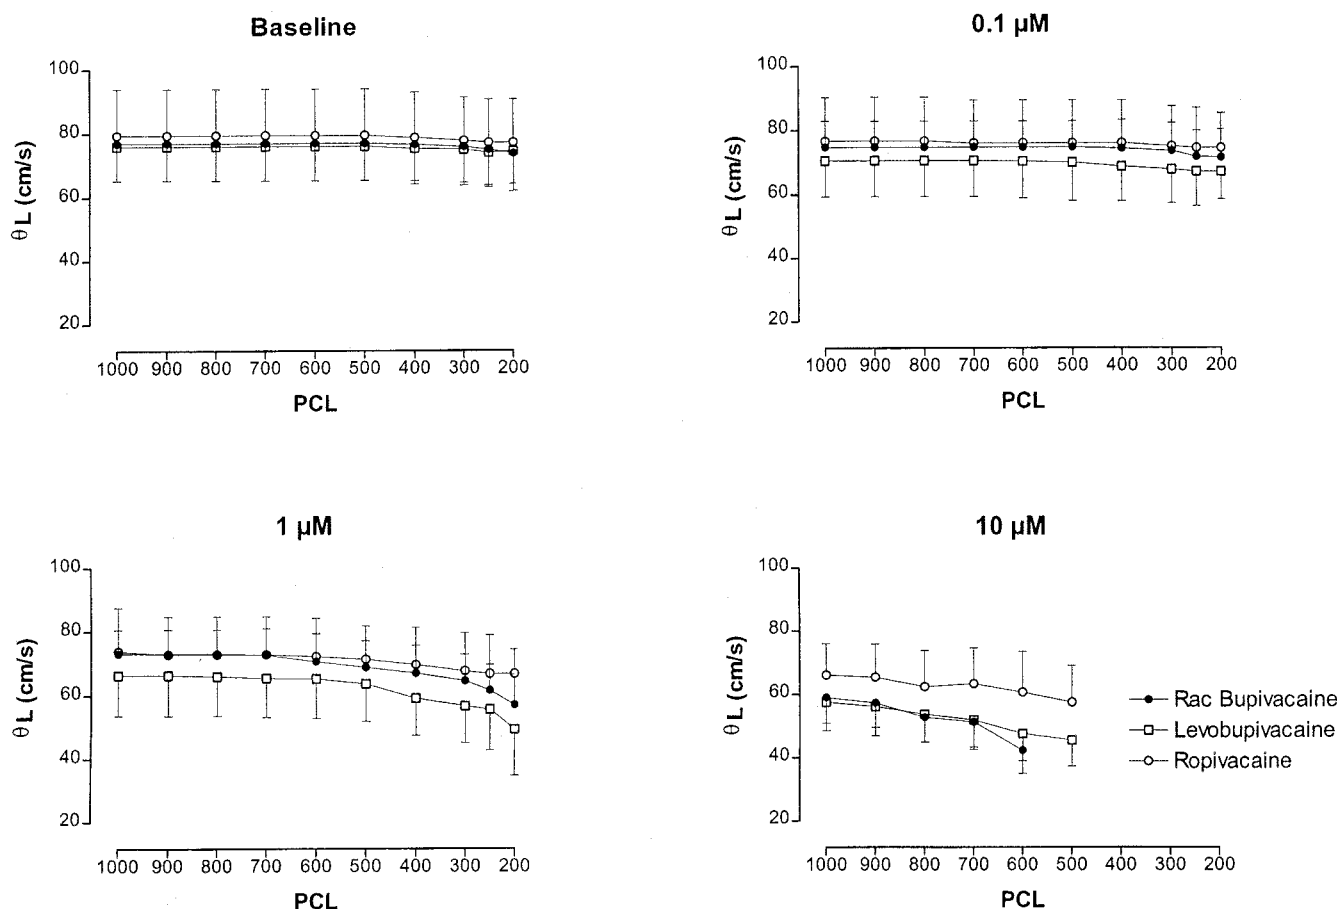

Fig. 1. Comparative use-dependent effects of racemic bupivacaine, levobupivacaine, and ropivacaine on longitudinal conduction velocity ( $\theta_L$ ). Data are expressed as mean  $\pm$  SD. All agents induced a significant use-dependent slowing of  $\theta_L$ . At 10  $\mu\text{M}$ , the use-dependent effect of racemic bupivacaine and levobupivacaine was stronger than that of ropivacaine ( $P < 0.05$ ). PCL = pacing cycle length (in milliseconds).

there was no intergroup statistical difference on either  $\lambda_L$  or  $\lambda_T$  shortening.

## Discussion

The current study shows that racemic bupivacaine, levobupivacaine, and ropivacaine induce a concentration- and use-dependent slowing of conduction velocities, with no change in the anisotropic ratio. At 1,000 ms, the potency ratio of racemic bupivacaine to levobupivacaine-ropivacaine is 1:1.38. Moreover, ropivacaine slows  $\theta_T$  less than racemic bupivacaine. Levobupivacaine and ropivacaine increased  $\text{PCL}_{\min}$  less than racemic bupivacaine. Racemic bupivacaine and levobupivacaine induce a stronger use-dependent slowing of  $\theta_L$  than ropivacaine, and the potency ratio of racemic bupivacaine on levobupivacaine-ropivacaine is 1:0.74 at 600 ms. Finally, racemic bupivacaine and levobupivacaine prolonged VERP, whereas ropivacaine did not. All three drugs significantly shortened the ventricular wavelengths, with no interagent difference. Therefore, it appears that ropivacaine is less cardiotoxic than racemic bupivacaine because of a lesser use-dependent effect on conduction, and that levobupivacaine has an intermediate effect.

## Effects on Conduction and Anisotropy

Effects of local anesthetics on cardiac electrophysiologic parameters have been fully investigated. It is widely established that racemic bupivacaine is more potent and more toxic than levobupivacaine, ropivacaine, and lidocaine.<sup>2,3,7,18-21</sup> The great potency and cardiotoxicity of racemic bupivacaine result from its high lipid solubility,<sup>22</sup> its effects on mitochondrial respiration,<sup>23-25</sup> and on use-dependent slowing of conduction caused by the fast-in-slow-out pattern of sodium channel inhibition.<sup>9,26</sup> However, most studies were not able to distinguish between concentration- or dose-dependent effects and use-dependent effects of anesthetic agents on conduction. Indeed, because of the design of most cell preparations, isolated heart, and animal models, the observed effects reflected additive actions of local anesthetic on conduction properties and use dependency, as pacing rates were usually too fast.

The current study confirms the published effects of racemic bupivacaine, levobupivacaine, and ropivacaine on cardiac conduction (*i.e.*, concentration- and use-dependent slowing of conduction).<sup>7-9</sup> In addition, our results show that the anisotropic ratio is unchanged. Al-

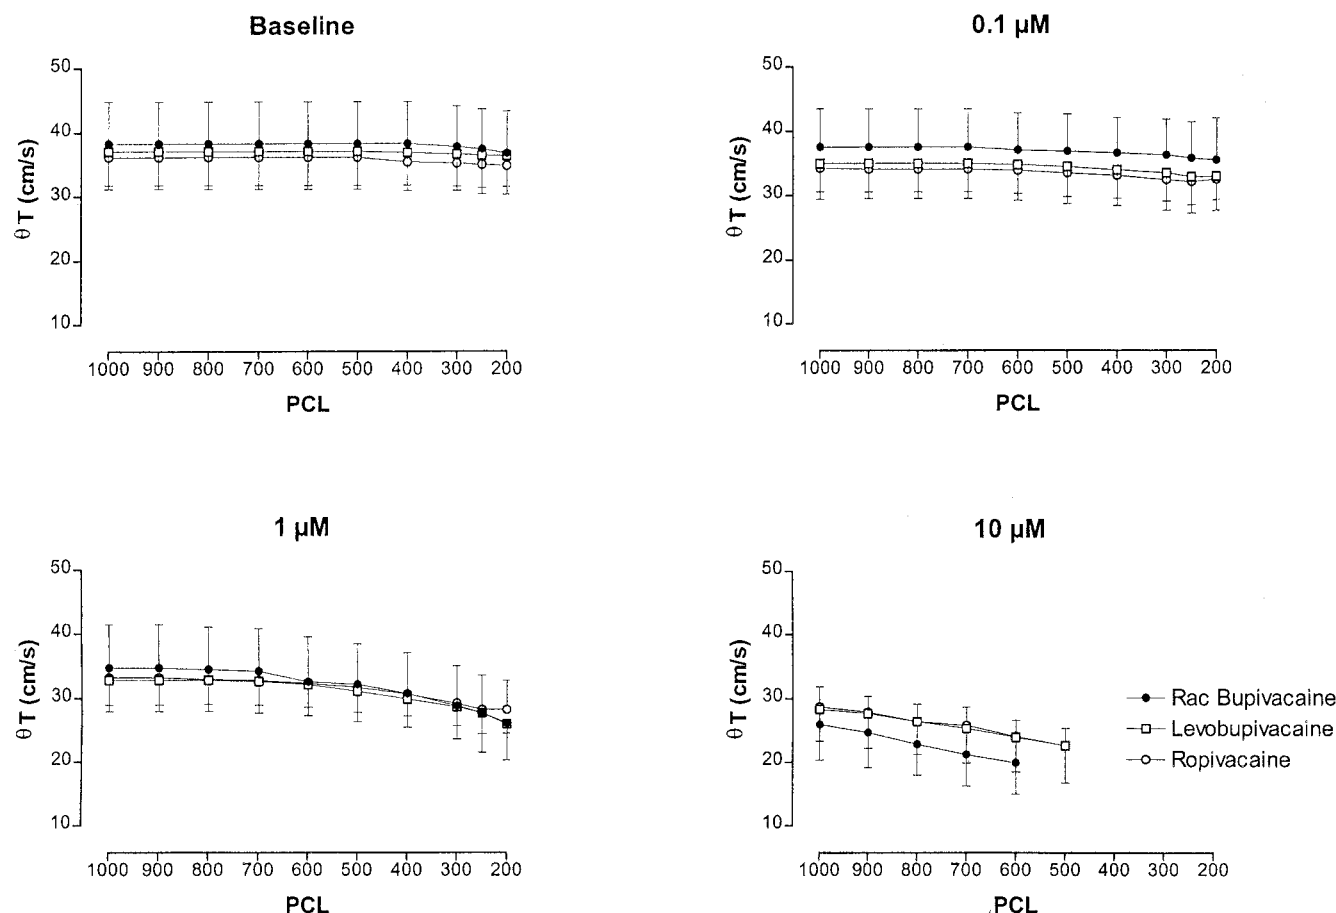

Fig. 2. Comparative use-dependent effects of racemic bupivacaine, levobupivacaine, and ropivacaine on transverse conduction velocity ( $\theta T$ ). Data are expressed as mean  $\pm$  SD. All agents induced a significant use-dependent slowing of  $\theta T$ . The use-dependent effect was not different among agents ( $P = 0.07$ ). PCL = pacing cycle length (in milliseconds).

though a greater inhibition of sodium channels<sup>27,28</sup> and a greater QRS widening<sup>7,8</sup> was shown with racemic bupivacaine compared with the two other agents, our study shows that, at best, the effects of racemic bupivacaine, levobupivacaine, and ropivacaine at 1,000 ms (*i.e.*, concentration effect) on  $\theta L$  are not different. However,

Table 3. Parameter Estimates

|                | ED <sub>50</sub><br>( $\mu M$ ) | Emax Rac Bupi<br>(% of E <sub>0</sub> ) | Emax Levo-Ropi<br>(% of E <sub>0</sub> ) |
|----------------|---------------------------------|-----------------------------------------|------------------------------------------|
| 1,000 ms       |                                 |                                         |                                          |
| Typical values | 2.03                            | 0.267                                   | 0.370                                    |
| $\omega^2$     | 3.58                            | 1.60                                    | 0.0661                                   |
| 600 ms         |                                 |                                         |                                          |
| Typical values | 3.44                            | 0.640                                   | 0.476                                    |
| $\omega^2$     | 1.40                            | 0.843                                   | 0.0744                                   |

Data are typical value with three significant digits.  $\omega^2$  is the variance of  $\eta$ , the interindividual variability. The arithmetic means of  $\eta$  was never significantly different from zero.

$\theta L$  = longitudinal conduction velocity;  $\theta T$  = transverse conduction velocity; Rac Bupi = racemic bupivacaine; Levo = levobupivacaine; Ropi = ropivacaine; ED<sub>50</sub> = dosing of local anesthetic that induces a 50% decrease in conduction velocity; E<sub>0</sub> = individual measured basal conduction velocity; Emax = maximal decrease in conduction velocity.

$\theta T$  was more affected by racemic bupivacaine than ropivacaine. One difference between our results and previous comparisons of the effects of racemic bupivacaine, levobupivacaine, and ropivacaine on cardiac conduction is that we used two conduction variables referring to different mechanisms of conduction, whereas a single variable was used in most studies, usually the QRS interval. The separation of conduction into  $\theta L$  and  $\theta T$  could have affected our results, because simultaneous fitting of these two variables resulted in a significant difference in the effects of racemic bupivacaine and levobupivacaine-ropivacaine on conduction velocity. ED<sub>50</sub> was similar for the three drugs in our study but was at least 10-fold lower than that reported by Mazoit *et al.*<sup>8</sup> We have no clear explanation, but some contributing factors can be pointed out. From our data, it appears that ED<sub>50</sub> increases with increasing pacing rates. We determined ED<sub>50</sub> for conduction velocity at a PCL of 1,000 ms (60 beats/min) and 600 ms (100 beats/min), whereas the pacing rate ranged from 170 to 350 beats/min in the study by Mazoit *et al.*<sup>8</sup> In addition, unlike Mazoit *et al.*, who worked on the whole isolated heart and on QRS measurements, we worked only on the epicardial tissue.

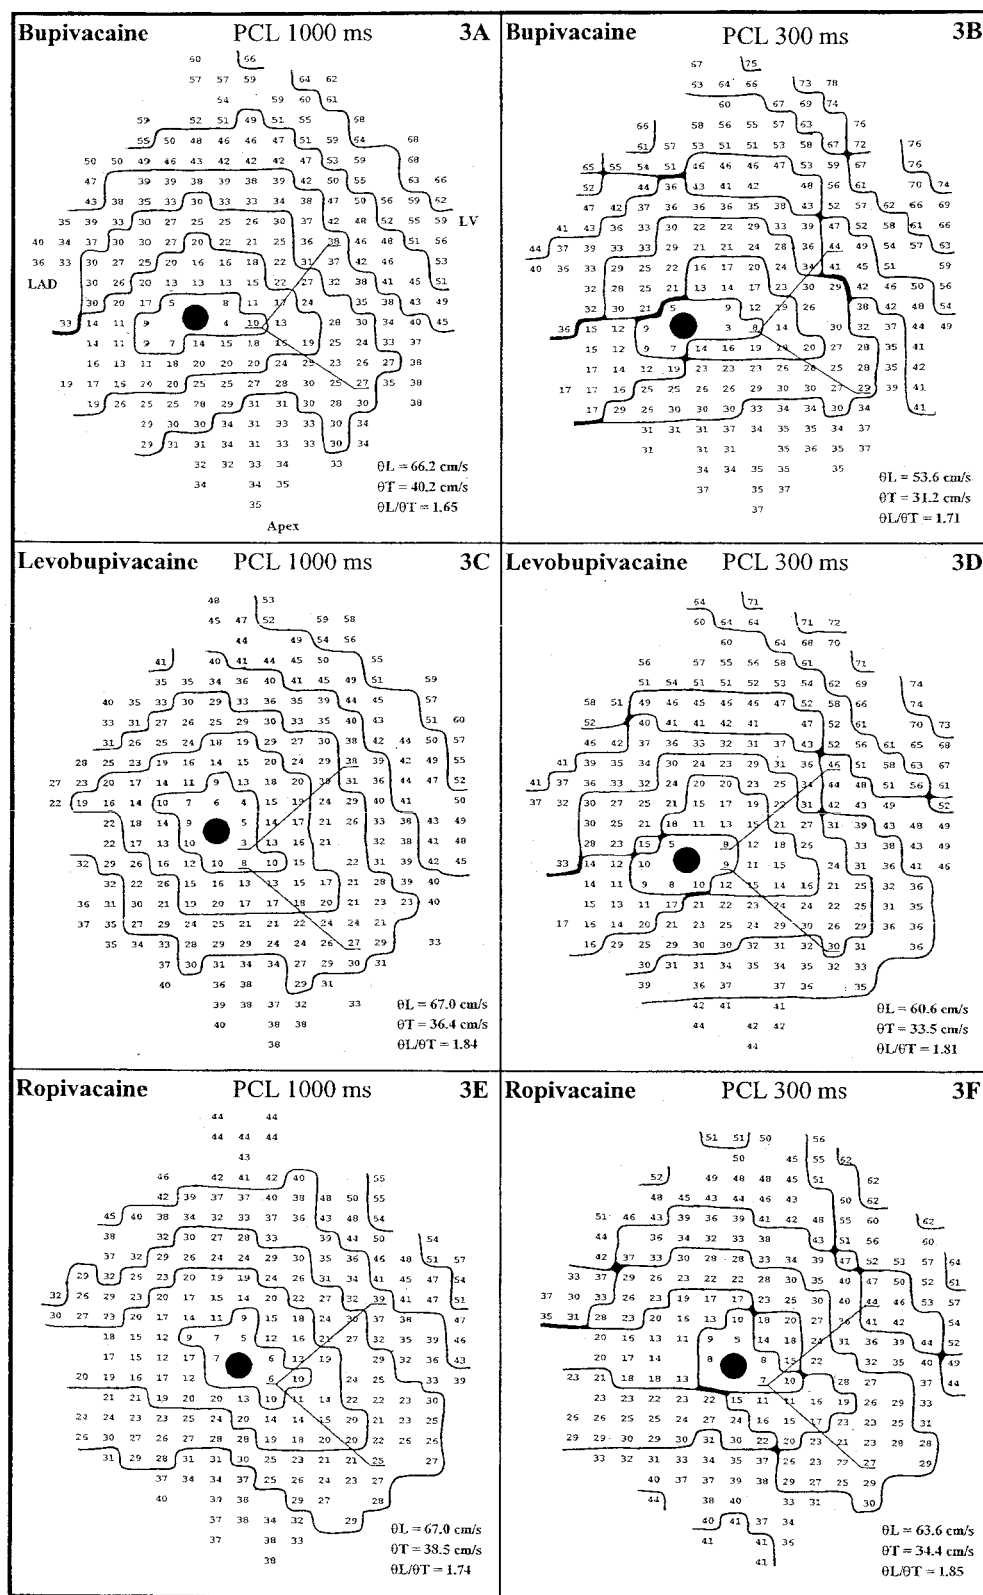

Fig. 3. Effects of pacing cycle length (PCL) on longitudinal ( $\theta L$ ) and transverse ( $\theta T$ ) conduction velocities during treatment of isolated hearts with  $1 \mu\text{M}$  racemic bupivacaine (A and B), levobupivacaine (C and D), or ropivacaine (E and F). The central closed circle represents the pacing site. Numbers indicate local activation times expressed in milliseconds. Isochrones are drawn at 10-ms intervals. The underlined activation times indicate the sites between which longitudinal and transverse conduction velocities were measured in panels. Conduction velocities were slowed by shortening the PCL from 1,000 to 300 ms. Heavy lines indicate coalescence of at least two isochrones because of unidirectional conduction block. LAD = left anterior descending coronary artery; LV = left ventricle.

**Table 4. Concentration-dependent Effect of Racemic Bupivacaine, Levobupivacaine, and Ropivacaine on Longitudinal ( $\theta$ L) and Transverse ( $\theta$ T) Conduction Velocity at PCL 300 ms, VERP, and Longitudinal ( $\lambda$ L) and Transverse ( $\lambda$ T) Wavelengths**

|                         | $\theta$ L<br>(cm/s) | $\theta$ T<br>(cm/s) | VERP              | $\lambda$ L<br>(mm) | $\lambda$ T<br>(mm) |
|-------------------------|----------------------|----------------------|-------------------|---------------------|---------------------|
| Rac bupivacaine (n = 9) |                      |                      |                   |                     |                     |
| Baseline                | 78.5 $\pm$ 12.0      | 38.9 $\pm$ 6.3       | 172.9 $\pm$ 9.4   | 134.6 $\pm$ 24.4    | 66.5 $\pm$ 11.9     |
| 0.1 $\mu$ M             | 74.7 $\pm$ 8.6       | 36.0 $\pm$ 5.5       | 176.6 $\pm$ 8.0   | 131.6 $\pm$ 20.1    | 63.2 $\pm$ 9.4      |
| 1 $\mu$ M               | 64.3 $\pm$ 8.3*†     | 28.8 $\pm$ 6.1*†     | 182.8 $\pm$ 6.2*  | 117.1 $\pm$ 16.5*†  | 52.4 $\pm$ 10.9*†   |
| Washout                 | 75.2 $\pm$ 8.1       | 36.5 $\pm$ 7.5       | 176.7 $\pm$ 6.5   | 132.8 $\pm$ 16.5    | 64.5 $\pm$ 14.4     |
| Levobupivacaine (n = 9) |                      |                      |                   |                     |                     |
| Baseline                | 74.9 $\pm$ 10.1      | 36.6 $\pm$ 4.9       | 169.2 $\pm$ 15.9  | 125.7 $\pm$ 24.7    | 60.4 $\pm$ 11.7     |
| 0.1 $\mu$ M             | 67.8 $\pm$ 10.5      | 33.6 $\pm$ 4.5       | 176.0 $\pm$ 31.0  | 118.9 $\pm$ 32.2    | 56.2 $\pm$ 12.4     |
| 1 $\mu$ M               | 56.6 $\pm$ 11.6*†    | 28.6 $\pm$ 4.2*†     | 182.4 $\pm$ 20.5* | 104.3 $\pm$ 24.1*   | 50.8 $\pm$ 9.8*     |
| Washout                 | 69.0 $\pm$ 12.0      | 33.6 $\pm$ 4.2       | 176.7 $\pm$ 16.9  | 123.9 $\pm$ 26.9    | 60.3 $\pm$ 11.6     |
| Ropivacaine (n = 8)     |                      |                      |                   |                     |                     |
| Baseline                | 77.6 $\pm$ 13.6      | 34.3 $\pm$ 4.8       | 172.4 $\pm$ 10.8  | 134.6 $\pm$ 20.1    | 59.4 $\pm$ 6.5      |
| 0.1 $\mu$ M             | 74.9 $\pm$ 12.4      | 32.5 $\pm$ 4.8       | 176.7 $\pm$ 11.3  | 132.5 $\pm$ 20.7    | 57.3 $\pm$ 6.5      |
| 1 $\mu$ M               | 67.5 $\pm$ 12.0*†    | 29.2 $\pm$ 3.6*†     | 179.0 $\pm$ 10.3  | 121.1 $\pm$ 21.6*   | 52.2 $\pm$ 5.0*†    |
| Washout                 | 72.1 $\pm$ 9.1       | 33.9 $\pm$ 4.1       | 176.4 $\pm$ 12.4  | 127.4 $\pm$ 13.1    | 59.8 $\pm$ 6.3      |

Data are not given at 10  $\mu$ M because no heart could be effectively paced at 300 ms pacing cycle length (PCL). Pacing site was located at the center of the left ventricular epicardium. Data are expressed as mean  $\pm$  SD.

\*  $P < 0.05$  versus baseline. †  $P < 0.05$  versus 0.1  $\mu$ M.

VERP = ventricular effective refractory periods.

Indeed, it was shown that pharmacologic agents have different effects on different subtypes of cells constituting the ventricular wall.<sup>29</sup> Our results also confirm the difference in  $E_{\max}$  among local anesthetics previously reported by Mazoit *et al.*<sup>8</sup> However, the potency ratios observed in our study are different from those previously published. Polley *et al.*<sup>5</sup> reported a racemic bupivacaine to ropivacaine ratio of 0.6 in parturients. Lyons *et al.*<sup>6</sup> reported a racemic bupivacaine to levobupivacaine ratio of 0.98 in parturients. It should be noted that these ratios were determined at very low concentrations and thus cannot be extrapolated to anesthetic concentrations and, *a fortiori*, to toxic concentrations. In addition, the

ratio was determined on nervous tissue, while it is shown that neuronal sodium channels are functionally different from cardiac ones.<sup>30</sup> This could explain that, using a similar equipotency ratio (0.76) in anesthetized pigs, Reiz *et al.*<sup>2</sup> showed that racemic bupivacaine prolongs the QRS interval more than ropivacaine. However, these investigators worked at spontaneous heart rate. Thus, the effect observed on QRS duration could have been modulated by the local anesthetic-induced bradycardia. In isolated perfused rabbit hearts, Mazoit *et al.*<sup>8</sup> showed that racemic bupivacaine, levobupivacaine, and ropivacaine induce a calculated maximum QRS widening in the ratio 1:0.4:0.3. In the current study, the racemic bupivacaine to levobupivacaine-ropivacaine ratio at 1,000-ms PCL was 1:1.38. The level of PCL we used and the epicardial tissue could also be advocated to explain the difference between the two studies. In addition, the precision of the fitting could have been impaired by the fact that we used a wide range of concentration.

Use dependency is a major factor for the occurrence of racemic bupivacaine-induced conduction block and reentrant arrhythmias.<sup>9</sup> Arlock<sup>28</sup> showed that, at equimolar concentration, the use dependency induced by racemic bupivacaine was stronger than that induced by ropivacaine. However, the control values in this study were recorded without any drug. Thus, Arlock assessed the concentration and use dependency at once. We used three indexes of use dependency:  $PCL_{\min}$ , conduction velocities, and calculated  $E_{\max}$  at a PCL of 600 ms. Analysis of  $PCL_{\min}$  and  $E_{\max}$  modeling showed that the use-dependent slowing of conduction induced by bupivacaine is stronger than that induced by levobupivacaine and ropivacaine. This is in agreement with published data. In fact, analysis of areas under the curves showed

**Table 5. Effects of Racemic (Rac) Bupivacaine, Levobupivacaine, and Ropivacaine on Dispersion of VERP**

| Concentration           | DI                | Dmax<br>(ms)    |
|-------------------------|-------------------|-----------------|
| Rac bupivacaine (n = 9) |                   |                 |
| Baseline                | 0.036 $\pm$ 0.019 | 23.5 $\pm$ 11.8 |
| 0.1 $\mu$ M             | 0.037 $\pm$ 0.011 | 27.7 $\pm$ 13.5 |
| 1 $\mu$ M               | 0.043 $\pm$ 0.017 | 24.1 $\pm$ 12.5 |
| Washout                 | 0.042 $\pm$ 0.022 | 21.1 $\pm$ 8.6  |
| Levobupivacaine (n = 9) |                   |                 |
| Baseline                | 0.056 $\pm$ 0.027 | 15.0 $\pm$ 6.9  |
| 0.1 $\mu$ M             | 0.066 $\pm$ 0.037 | 17.5 $\pm$ 13.5 |
| 1 $\mu$ M               | 0.050 $\pm$ 0.024 | 24.1 $\pm$ 12.5 |
| Washout                 | 0.044 $\pm$ 0.017 | 21.1 $\pm$ 8.6  |
| Ropivacaine (n = 8)     |                   |                 |
| Baseline                | 0.033 $\pm$ 0.011 | 14.9 $\pm$ 5.4  |
| 0.1 $\mu$ M             | 0.031 $\pm$ 0.007 | 14.0 $\pm$ 3.7  |
| 1 $\mu$ M               | 0.035 $\pm$ 0.016 | 15.9 $\pm$ 9.3  |
| Washout                 | 0.037 $\pm$ 0.021 | 16.3 $\pm$ 9.9  |

Ventricular effective refractory period (VERP) was measured on six sites over the left epicardium at a pacing cycle length of 300 ms. Data are expressed as mean  $\pm$  SD.

DI = dispersion index; Dmax = maximal dispersion.



that racemic bupivacaine and levobupivacaine induced a similar use-dependent slowing of  $\theta L$ , which was stronger than that induced by ropivacaine. Irrespective of the ratio of equipotency, the stronger use dependency induced by bupivacaine is a result of the fact that sodium channels' recovery from racemic bupivacaine-induced block is slower than with levobupivacaine or ropivacaine. Indeed, it was shown that the time constant for recovery of channels from 10  $\mu M$  bupivacaine is 2.1 s versus 1.4 s for the same concentration of ropivacaine.<sup>28</sup> Mazoit *et al.*<sup>8</sup> showed that racemic bupivacaine, levobupivacaine, and ropivacaine induce a rate-dependent QRS widening in the ratio 1:0.5:0.25. In the current study, the racemic bupivacaine to levobupivacaine-ropivacaine ratio was 1:0.74. The level of PCL we used and the preparation also explain, at least in part, this difference. In summary, as the effects of levobupivacaine on conduction are similar to those of one or the other agent, depending on the parameter studied, the effects of levobupivacaine appear to be intermediate between ropivacaine and bupivacaine.

#### *Effects on Refractoriness, Wavelengths, and Implication for Arrhythmogenicity*

Different effects of local anesthetics on refractory periods were reported. Thus, in the anesthetized dog, Hotvedt *et al.*<sup>31</sup> showed that racemic bupivacaine (1,000–2,000 ng/ml) does not change VERP or monophasic action potential duration at 50 and 90% repolarization. On a similar model, Kasten *et al.*<sup>32</sup> showed that bupivacaine prolongs and induces a dispersion of VERP. However, VERP was measured in spontaneous rhythm, and then the results also reflected the effects of anesthesia- and racemic bupivacaine-induced bradycardia. Huang *et al.*<sup>20</sup> reported a shortening of the corrected QT interval after large doses of either racemic bupivacaine or levobupivacaine in conscious sheep. As the QT interval reflects both ventricular depolarization and repolarization, as a widening of the QRS interval also occurred in these animals, one can conclude that the repolarization was shortened in this study. On isolated hearts, conflicting effects of racemic bupivacaine on VERP were reported.<sup>9,33</sup> In the current study, racemic bupivacaine and levobupivacaine induced a significant prolongation of VERP, whereas ropivacaine did not. This might be explained by a weaker inhibiting effect of ropivacaine on cardiac calcium and potassium channels in comparison with bupivacaine. No dispersion of VERP values over the left ventricular epicardium occurred, whatever the agent. Therefore, in the case of arrhythmia induced by an overdose of the three anesthetics studied, it seems that the mechanism of arrhythmia could not be caused by dispersion-based reentry.

Drugs that decrease wavelengths tend to possess arrhythmogenic potency.<sup>34</sup> As all three local anesthetics induce a concentration-dependent decrease in wave-

lengths, all are potentially arrhythmogenic. In the current study, we did not observe any difference in the shortening of wavelengths among the three local anesthetics. However, it should be noted that the wavelengths were calculated at a PCL of 300 ms. Shorter PCL, by decreasing further the conduction velocities and by limiting the increase in VERP, could enhance the shortening of wavelengths by local anesthetics. This could account for the occurrence of one reentrant ventricular tachycardia in our study, during pacing at PCL 250 ms after treatment with 1  $\mu M$  racemic bupivacaine. On the other hand, wavelengths are calculated at 1  $\mu M$  racemic bupivacaine, levobupivacaine, and ropivacaine, because the pacing at a PCL of 300 ms was ineffective at 10  $\mu M$ . However, investigators have reported that these anesthetics induce cardiac arrhythmias at higher concentrations (3–6  $\mu g/ml$ , *i.e.*, 9–18  $\mu M$ ).<sup>9,19,33</sup> Finally, a subtle interaction between the concentration- and the use-dependent effects is probably at the cornerstone of the occurrence of ventricular arrhythmias. Thus, one must keep in mind that a higher incidence of arrhythmias was observed after treatment of animals<sup>35</sup> or isolated hearts<sup>19</sup> with racemic bupivacaine compared with levobupivacaine and ropivacaine at equal concentrations. Given the higher potency of racemic bupivacaine, one could argue that the highest arrhythmogenicity is caused by the highest potency, and that at equipotent concentrations, all three agents could be equally arrhythmogenic. Further studies are required to address this hypothesis, and similar precautions must be taken in the clinical use of all three agents to prevent tragic cardiotoxic accidents.

#### *Limitations of the Study and Clinical Implications*

Care must be taken before extrapolating the current results to the clinical setting. The interaction of the hemodynamic status and of the autonomic nervous system with the intrinsic electrophysiologic properties of the ventricular myocardium is ignored in the model. In addition, our results on the electrophysiologic parameters are obtained from a thin epicardial layer. As previously stated, because of slight differences in the electrophysiologic behaviors of cells constituting the ventricular wall,<sup>36</sup> other subtypes could be affected differently than epicardial myocytes,<sup>29</sup> and, theoretically, this could facilitate conduction blocks and reentrant arrhythmias.

Cardiotoxicity of local anesthetics results from increased blood concentrations caused by accidental intravascular injection of an expectedly epidural dose, or to the rapid absorption of the anesthetic after infiltration in a site with a rich blood supply. The most potent agents are also the more toxic, and this is accounted for by the high mortality rate in the case of toxic accident with racemic bupivacaine<sup>1</sup> compared with levobupivacaine<sup>37</sup> or ropivacaine.<sup>38,39</sup> However, one must keep in mind that the toxic effects of local anesthetics could be amplified in patients with cardiac conduction disturbances

or in those taking medications that slow cardiac conduction.<sup>40–42</sup> Moreover, with regard to the mechanism of arrhythmias, one must take into account the main role of the use dependency in the occurrence of arrhythmias, especially during resuscitation by the use of positive chronotropic drugs. Indeed, the beat-to-beat slowing of conduction caused by the progressive block of sodium channels leads to conduction blocks, and therefore to the occurrence of reentrant circuits.<sup>9,26</sup> Although the results of the current study suggest that patients with acute cardiotoxic accidents with levobupivacaine or ropivacaine should sustain higher heart rates than when racemic bupivacaine is involved, the acceleration of heart rate when resuscitating patients with levobupivacaine or ropivacaine cardiotoxicity should also be performed with caution.

In conclusion, the current study shows that racemic bupivacaine, levobupivacaine, and ropivacaine slow longitudinal and transverse conduction velocities in a concentration- and use-dependent manner, without changing the anisotropic ratio. Effects of all agents led to a decrease in wavelengths. The use dependency was stronger with racemic bupivacaine, and this mainly contributes to its higher arrhythmogenicity.

The authors thank Régine Roux, Patrick Chartreux, Christian Francou (Assistants in Chemistry), and the entire Pharmacy Staff of the University Hospital Nîmes (Nîmes, France), and the entire personnel of the Laboratory of Anesthesiology and Cardiovascular Physiology (Unité propre de Recherche de l'Enseignement Supérieur-Equipe d'Accueil 2992, Medical School of Montpellier-Nîmes, Nîmes, France).

## References

- Albright GA: Cardiac arrest following regional anesthesia with etidocaine or bupivacaine. *ANESTHESIOLOGY* 1979; 51:285–7
- Reiz S, Häggmark S, Johansson G, Nath S: Cardiotoxicity of ropivacaine: A new amide local anesthetic agent. *Acta Anaesthesiol Scand* 1989; 33:93–8
- Scott DB, Lee A, Fagan D, Bowler GMR, Bloomfield P, Lundh R: Acute toxicity of ropivacaine compared with that of bupivacaine. *Anesth Analg* 1989; 69:563–9
- Foster RH, Markham A: Levobupivacaine: a review of its pharmacology and use as local anaesthetic. *Drugs* 2000; 59:551–79
- Polley LS, Colomb MO, Naughton NN, Wagner DS, Van de Ven CJM: Relative analgesic potencies of ropivacaine and bupivacaine for epidural analgesia in labor. Implications for therapeutic indexes. *ANESTHESIOLOGY* 1999; 90:944–50
- Lyons G, Columb M, Wilson RC, Johnson RV: Epidural pain relief in labour: potencies of levobupivacaine and racemic bupivacaine. *Br J Anaesth* 1998; 81:899–901
- Morrison SG, Dominguez JJ, Frascarolo P, Reiz S: A comparison of the electrocardiographic cardiotoxic effects of racemic bupivacaine, levobupivacaine, and ropivacaine in anesthetized swine. *Anesth Analg* 2000; 90:1308–14
- Mazoit JX, Decaux A, Bouaziz H, Edouard A: Comparative ventricular electrophysiologic effects of racemic bupivacaine, levobupivacaine, and ropivacaine on the isolated rabbit heart. *ANESTHESIOLOGY* 2000; 93:784–92
- de La Coussaye JE, Brugada J, Allessie MA: Electrophysiologic and arrhythmogenic effects of bupivacaine: A study with high resolution ventricular epicardial mapping in rabbit hearts. *ANESTHESIOLOGY* 1992; 77:132–41
- Aya AGM, Robert E, Bruelle P, Lefrant JY, Juan JM, Peray P, Eledjam JJ, de La Coussaye JE: Effects of ketamine on ventricular conduction, refractoriness, and wavelength. Potential antiarrhythmic effects: A high-resolution epicardial mapping in rabbit hearts. *ANESTHESIOLOGY* 1997; 87:1417–27
- Aya AGM, de La Coussaye JE, Robert E, Ripart J, Lefrant JY, Peray P, Eledjam JJ: Effects of halothane and enflurane on ventricular conduction, refractoriness, and wavelength: A concentration-response study in rabbit hearts. *ANESTHESIOLOGY* 1999; 91:1873–81
- Robert E, Bruelle P, de La Coussaye JE, Juan JM, Brugada J, Péray P, Dauzat M, Eledjam JJ: Electrophysiologic and proarrhythmogenic effects of therapeutic and toxic doses of imipramine: A study with high resolution ventricular epicardial mapping in rabbit hearts. *J Pharmacol Exp Ther* 1996; 278:170–8
- Allessie MA, Hoeks APG, Schmitz GML, Reneman RS: On-line mapping system for the visualisation of the electrical activation of the heart. *Int J Cardiac Imaging* 1987; 2:59–63
- Clerc L: Directional differences on impulse spread in trabecular muscle from mammalian heart. *J Physiol (Lond)* 1976; 255:335–46
- Spach MS, Miller WT, Geselowitz DB, Barr RC, Kootsey JM, Johnson EA: The discontinuous nature of propagation in normal canine cardiac muscle: Evidence for recurrent discontinuities of intracellular resistance that affect the membrane currents. *Circ Res* 1981; 48:39–54
- Sheiner LB, Beal SL, Boeckmann A: NONMEM Users Guides 1–6. Regents of the University of California, 1979–1999
- Eadie WT, Drijard D, James FE, Roos M, Sadoulet B: Statistical Methods in Experimental Physics. Amsterdam, North-Holland, 1982, pp 471–84
- Moller R, Covino BG: Cardiac electrophysiologic properties of bupivacaine and lidocaine compared with those of ropivacaine, a new amide local anesthetic. *ANESTHESIOLOGY* 1990; 72:322–9
- Pitkanen M, Feldman HS, Arthur GR, Covino BG: Chronotropic and inotropic effects of ropivacaine, bupivacaine, and lidocaine in the spontaneously beating and electrically paced isolated, perfused rabbit heart. *Reg Anesth* 1992; 17:183–92
- Huang YF, Pryor ME, Mather LE, Veering BT: Cardiovascular and central nervous system effects of intravenous levobupivacaine and bupivacaine in sheep. *Anesth Analg* 1998; 86:797–804
- Chang DH, Ladd LA, Wilson KA, Gelgor L, Mather LE: Tolerability of large-dose intravenous levobupivacaine in sheep. *Anesth Analg* 2000; 91:671–9
- Eledjam JJ, de La Coussaye JE, Brugada J, Bassoul B, Gagnol JP, Fabregat JR, Massé C, Sassine A: In vitro study on mechanisms of bupivacaine-induced depression of myocardial contractility. *Anesth Analg* 1989; 69:732–5
- Butterworth FF, Brownlow RC, Leith JP, Prielipp RC, Cole LR: Bupivacaine inhibits cyclic-3',5'-adenosine monophosphate production: A possible contributing factor to cardiovascular toxicity. *ANESTHESIOLOGY* 1993; 79:88–95
- Sztark F, Tueux O, Erny P, Dabadie P, Mazat JP: Effects of bupivacaine on cellular oxygen consumption and adenine nucleotide metabolism. *Anesth Analg* 1994; 78:335–9
- Sztark F, Malgat M, Dabadie P, Mazat JP: Comparison of the effects of bupivacaine and ropivacaine on heart cell mitochondrial bioenergetics. *ANESTHESIOLOGY* 1998; 88:1340–9
- Clarkson CW, Hondeghem ML: Mechanism for bupivacaine depression of cardiac conduction: Fast block of sodium channels during the action potential with slow recovery from block during diastole. *ANESTHESIOLOGY* 1985; 62:396–405
- Hondeghem LM, Katzung BG: Time- and voltage-dependent interactions of antiarrhythmic drugs with cardiac sodium channels. *Biochim Biophys Acta* 1977; 472:373–98
- Arlock P: Actions of three local anesthetics: Lidocaine, bupivacaine and ropivacaine on guinea pig papillary muscle sodium channels (Vmax). *Pharmacol Toxicol* 1988; 63:96–104
- Krishnan SC, Antzelevitch C: Sodium channel block produces opposite electrophysiological effects in canine ventricular epicardium and endocardium. *Circ Res* 1991; 69:277–91
- Fozzard HA, Hanck DA: Structure and function of voltage-dependent sodium channels: Comparison of brain II and cardiac isoforms. *Physiol Rev* 1996; 76:887–926
- Refsvold R, Refsum H, Helgesen KG: Cardiac electrophysiologic and hemodynamic effects related to plasma levels of bupivacaine in the dog. *Anesth Analg* 1985; 64:388–94
- Kasten GW: Amide local anesthetic alterations of effective refractory period temporal dispersion: Relationship to ventricular arrhythmias. *ANESTHESIOLOGY* 1986; 65:61–6
- Lacombe P, Blaise G, Loumet D, Hollmann C: Electrophysiologic effects of bupivacaine in the isolated rabbit heart. *Anesth Analg* 1991; 72:62–9
- Rensma PL, Allessie MA, Lammers WJ, Bonke FI, Schalij MJ: Length of excitation wave and susceptibility to reentrant atrial arrhythmias in normal conscious dogs. *Circ Res* 1988; 62:395–410
- Feldman HS, Arthur GR, Covino BG: Comparative systemic toxicity of convulsant and supraconvulsant doses of intravenous ropivacaine, bupivacaine, and lidocaine in the conscious dog. *Anesth Analg* 1989; 69:794–801
- Liu DW, Gintant GA, Antzelevitch C: Ionic bases for electrophysiological distinctions among epicardial, midmyocardial, and endocardial myocytes from the free wall of the canine left ventricle. *Circ Res* 1993; 72:671–87
- Kopacz DJ, Allen HW: Accidental intravenous levobupivacaine. *Anesth Analg* 1999; 89:1027–9
- Ruetsch YA, Fattinger KE, Borgeat A: Ropivacaine-induced convulsions and severe cardiac dysrhythmia after sciatic block. *ANESTHESIOLOGY* 1999; 90:1784–6
- Eledjam JJ, Gros T, Viel E, Mazoit JX, Bassoul B: Ropivacaine overdose and systemic toxicity. *Anaesth Intens Care* 2000; 28:705–7
- Coriat P, Harari A, Ducardonnet A, Tarot JP, Viars P: Risk of heart block during extradural anaesthesia in patients with right bundle branch block and left anterior hemiblock. *Br J Anaesth* 1981; 53:545–8
- Eledjam JJ, de La Coussaye JE, Colson P, Viel E, Bassoul B, Bertinchant JP, d'Athis F: Is epidural anaesthesia using bupivacaine safe in patients with atrioventricular conduction defects? *Acta Anaesthesiol Scand* 1989; 33:402–4
- Timour Q, Freysz M, Couzon P, Loufoua J, Bertrix L, Gerentes I, Faucon G: Possible role of drug interactions in bupivacaine-induced problems related to intra-ventricular conduction disorders. *Reg Anesth* 1990; 15:180–5
